# Supplementary figures and images for: Virtual screening and activity evaluation of human uric acid transporter 1 (hURAT1) inhibitors
Source: Royal Society of Chemistry journal article supplement (doi:10.1039/d2ra07193b), 2023-01-01

# TN1148

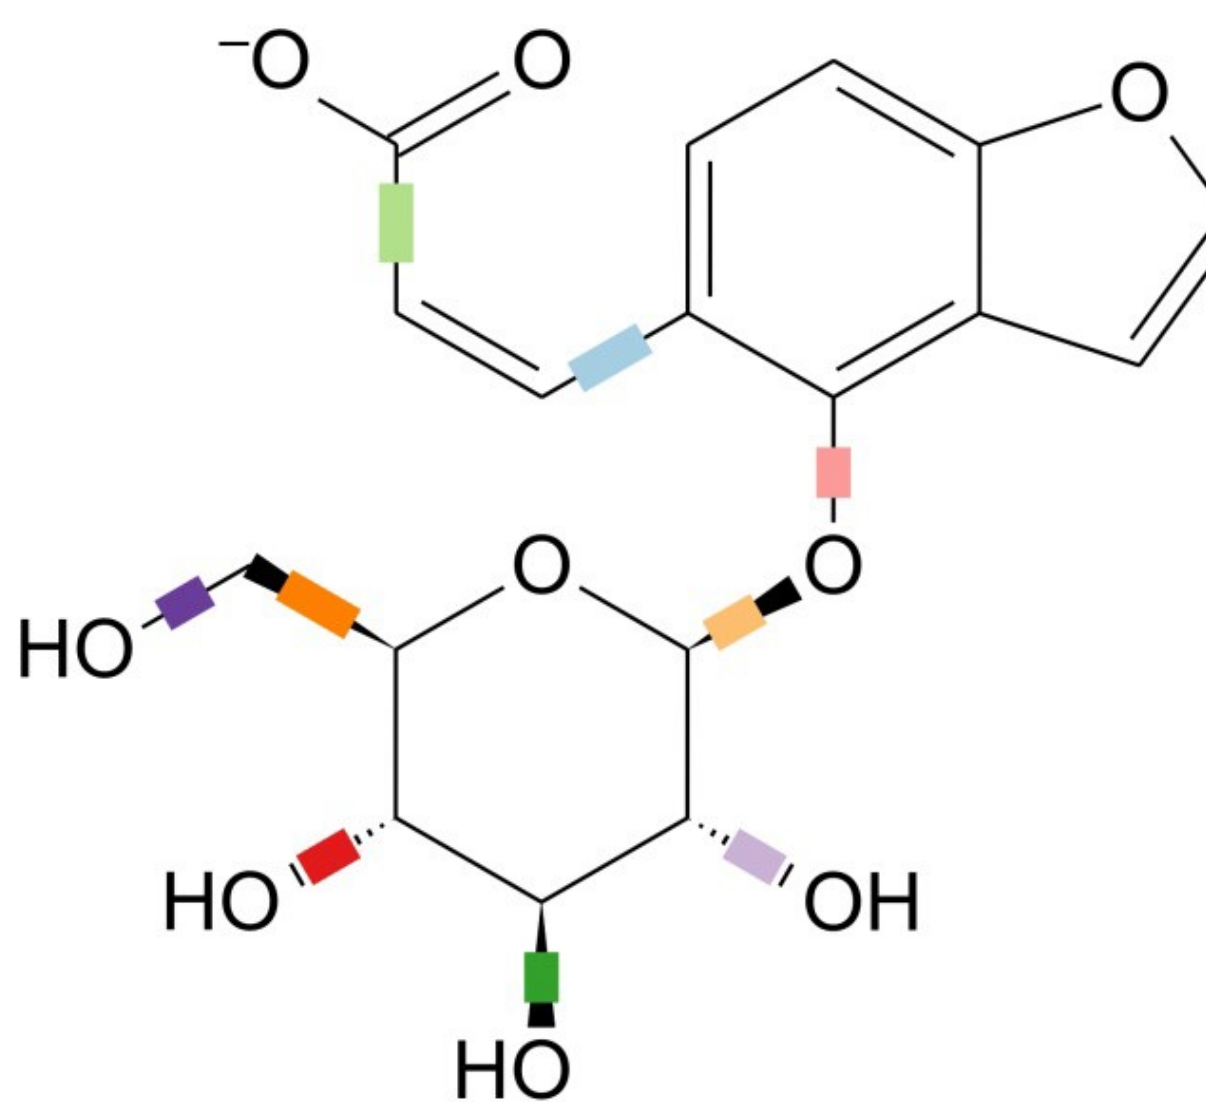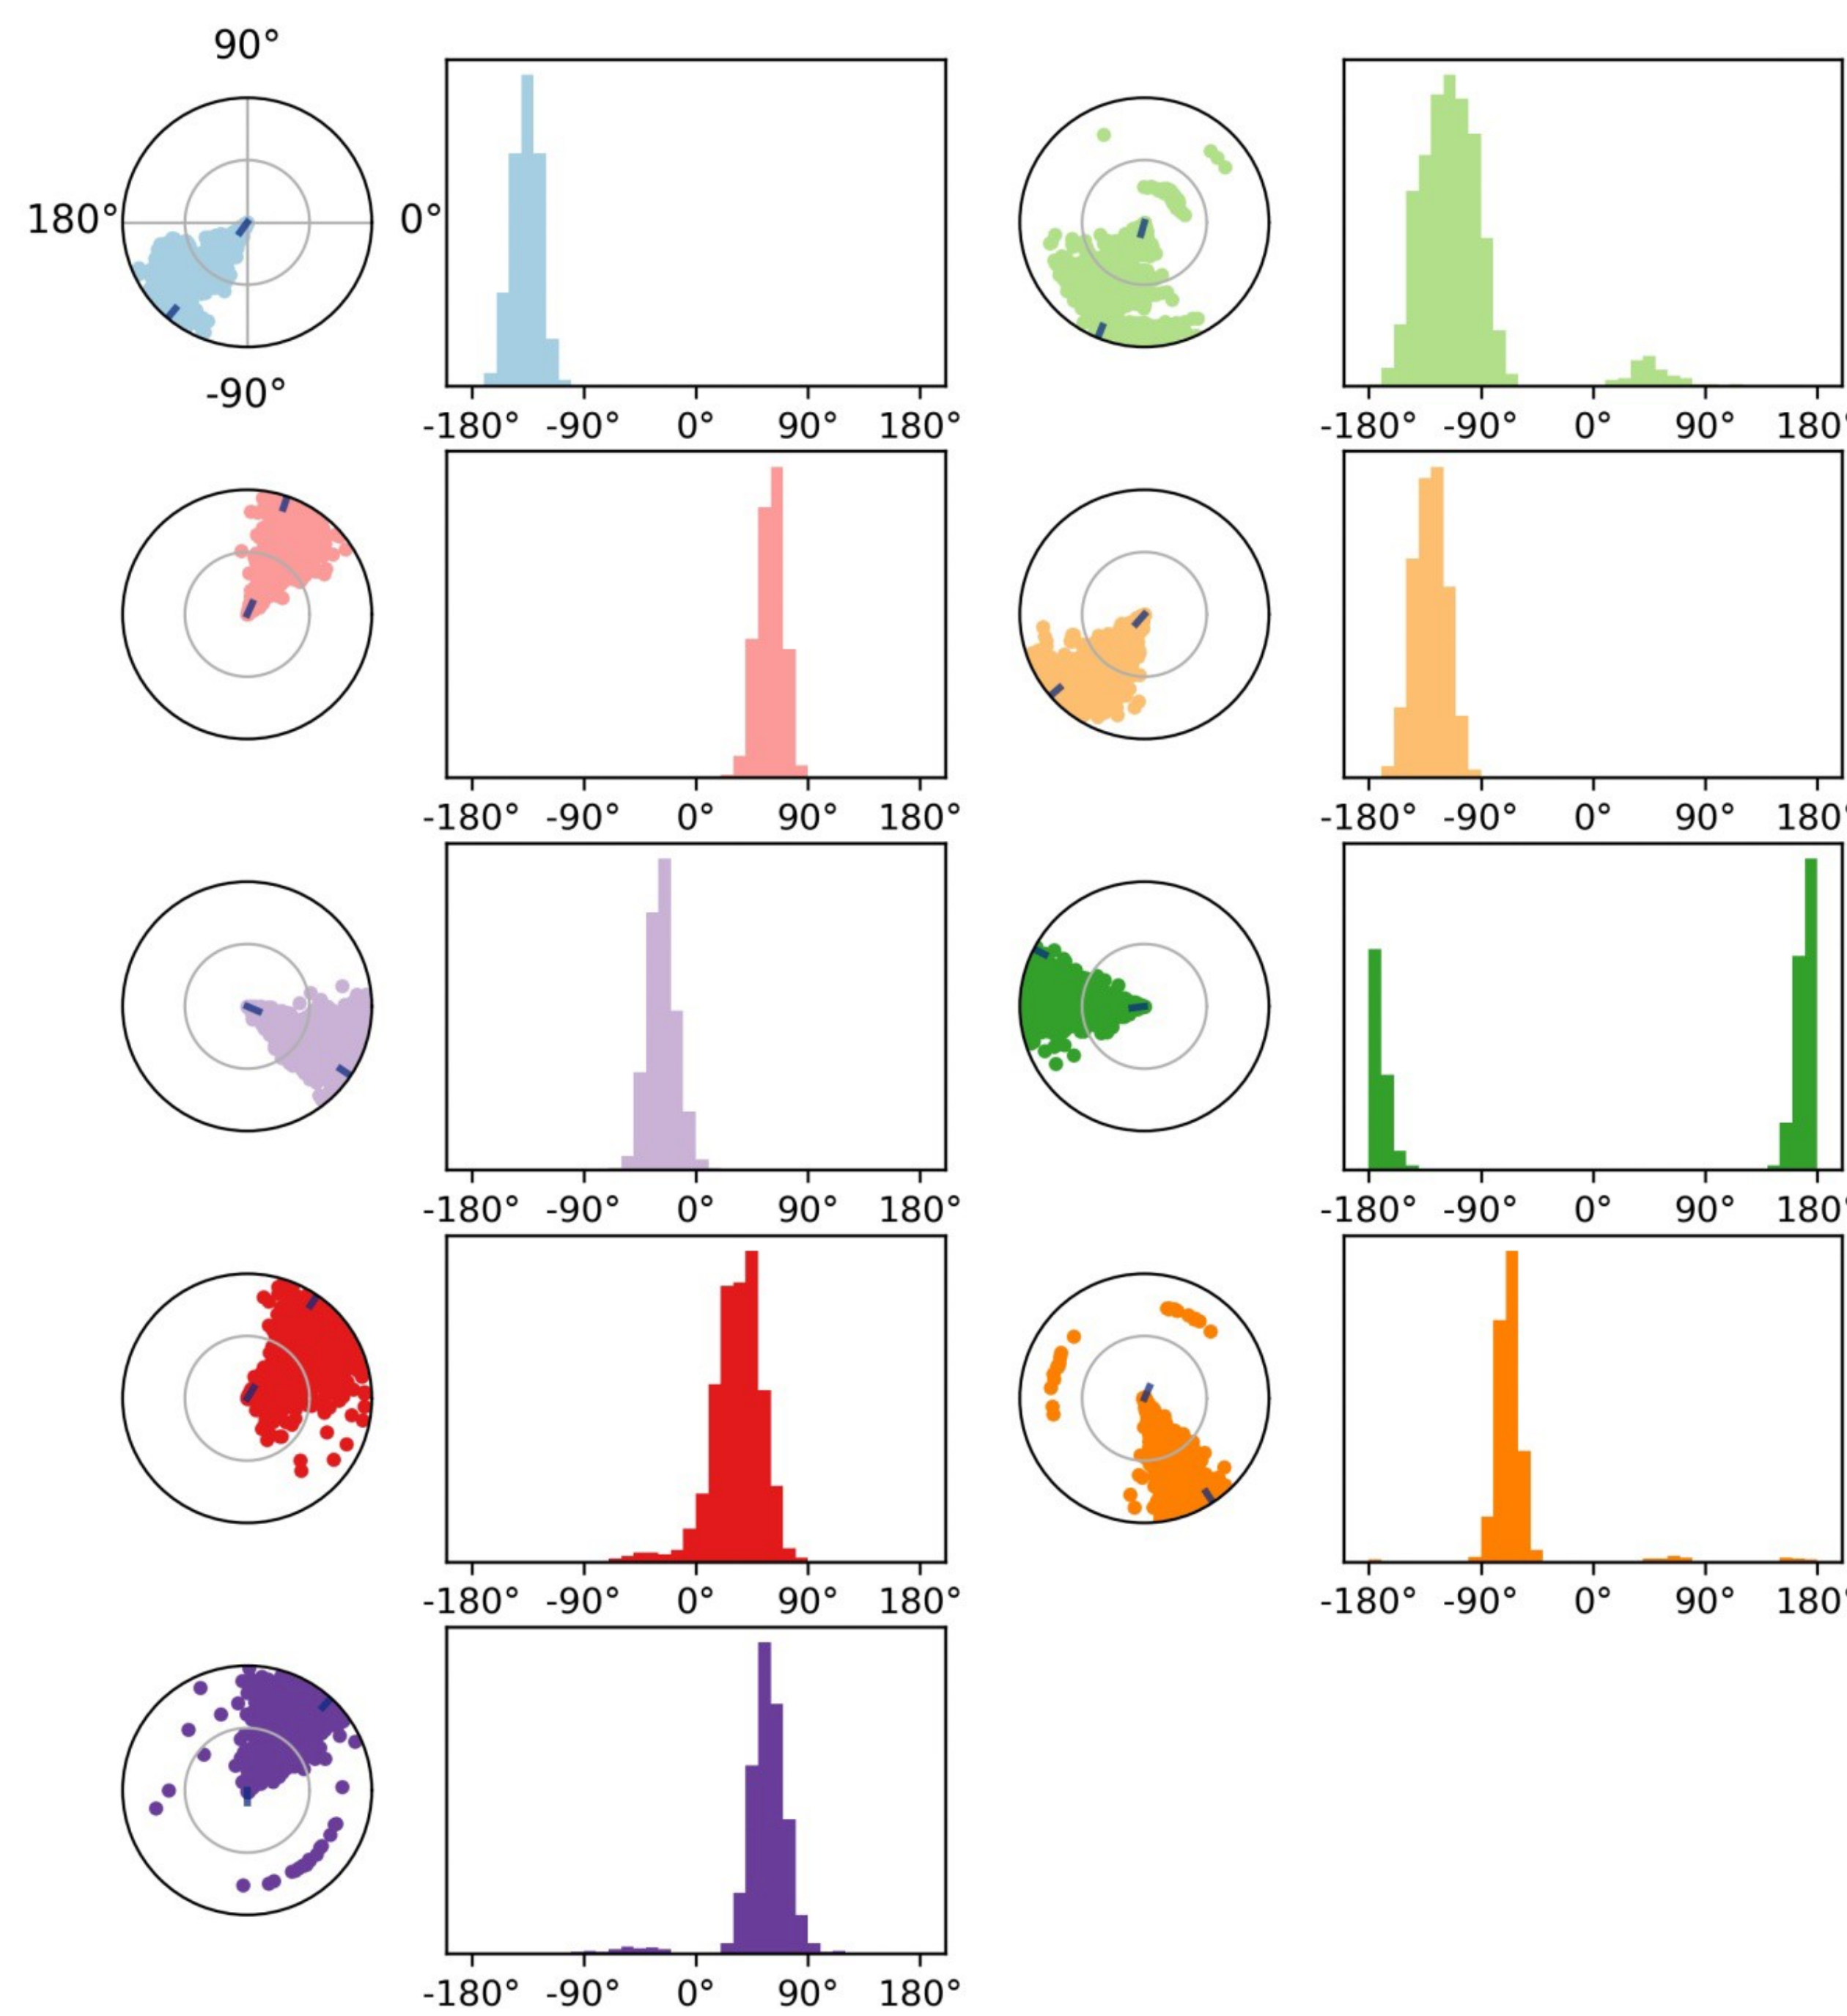

# TN1008

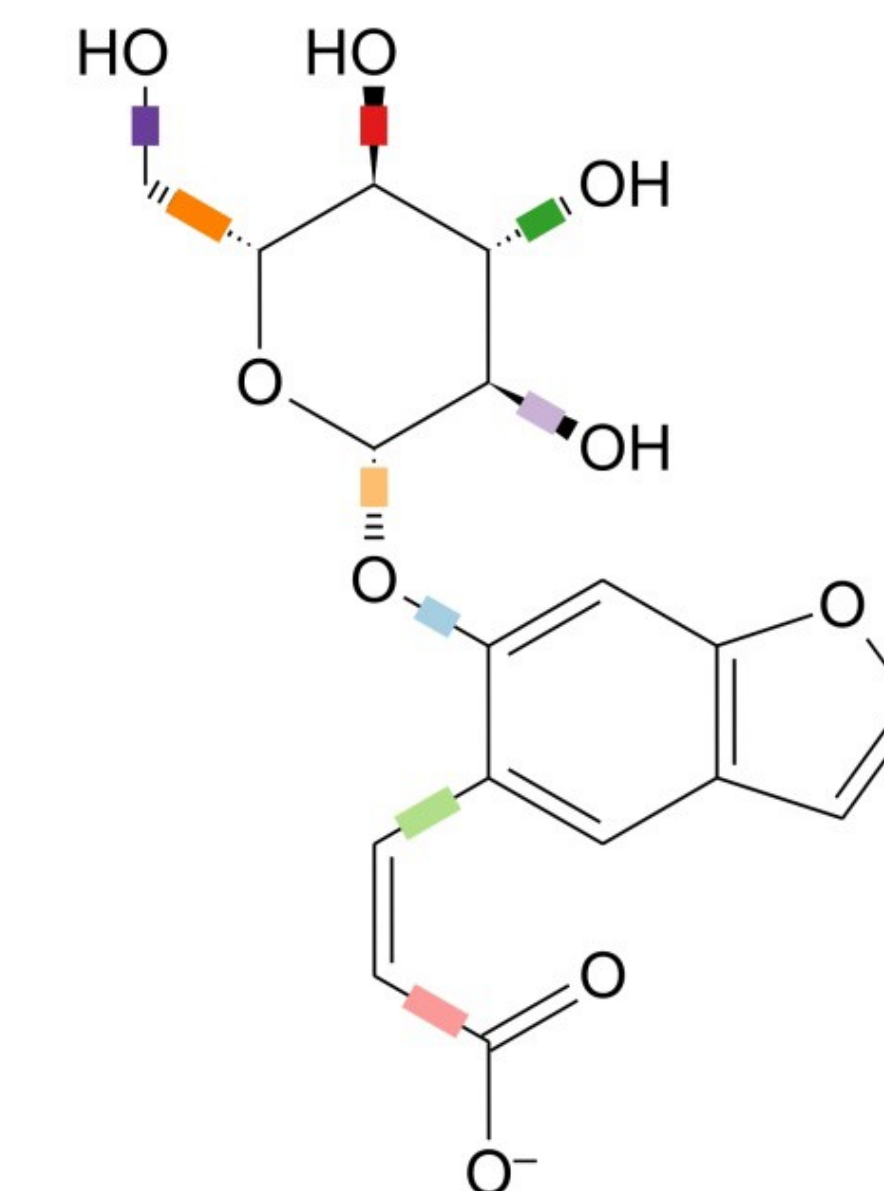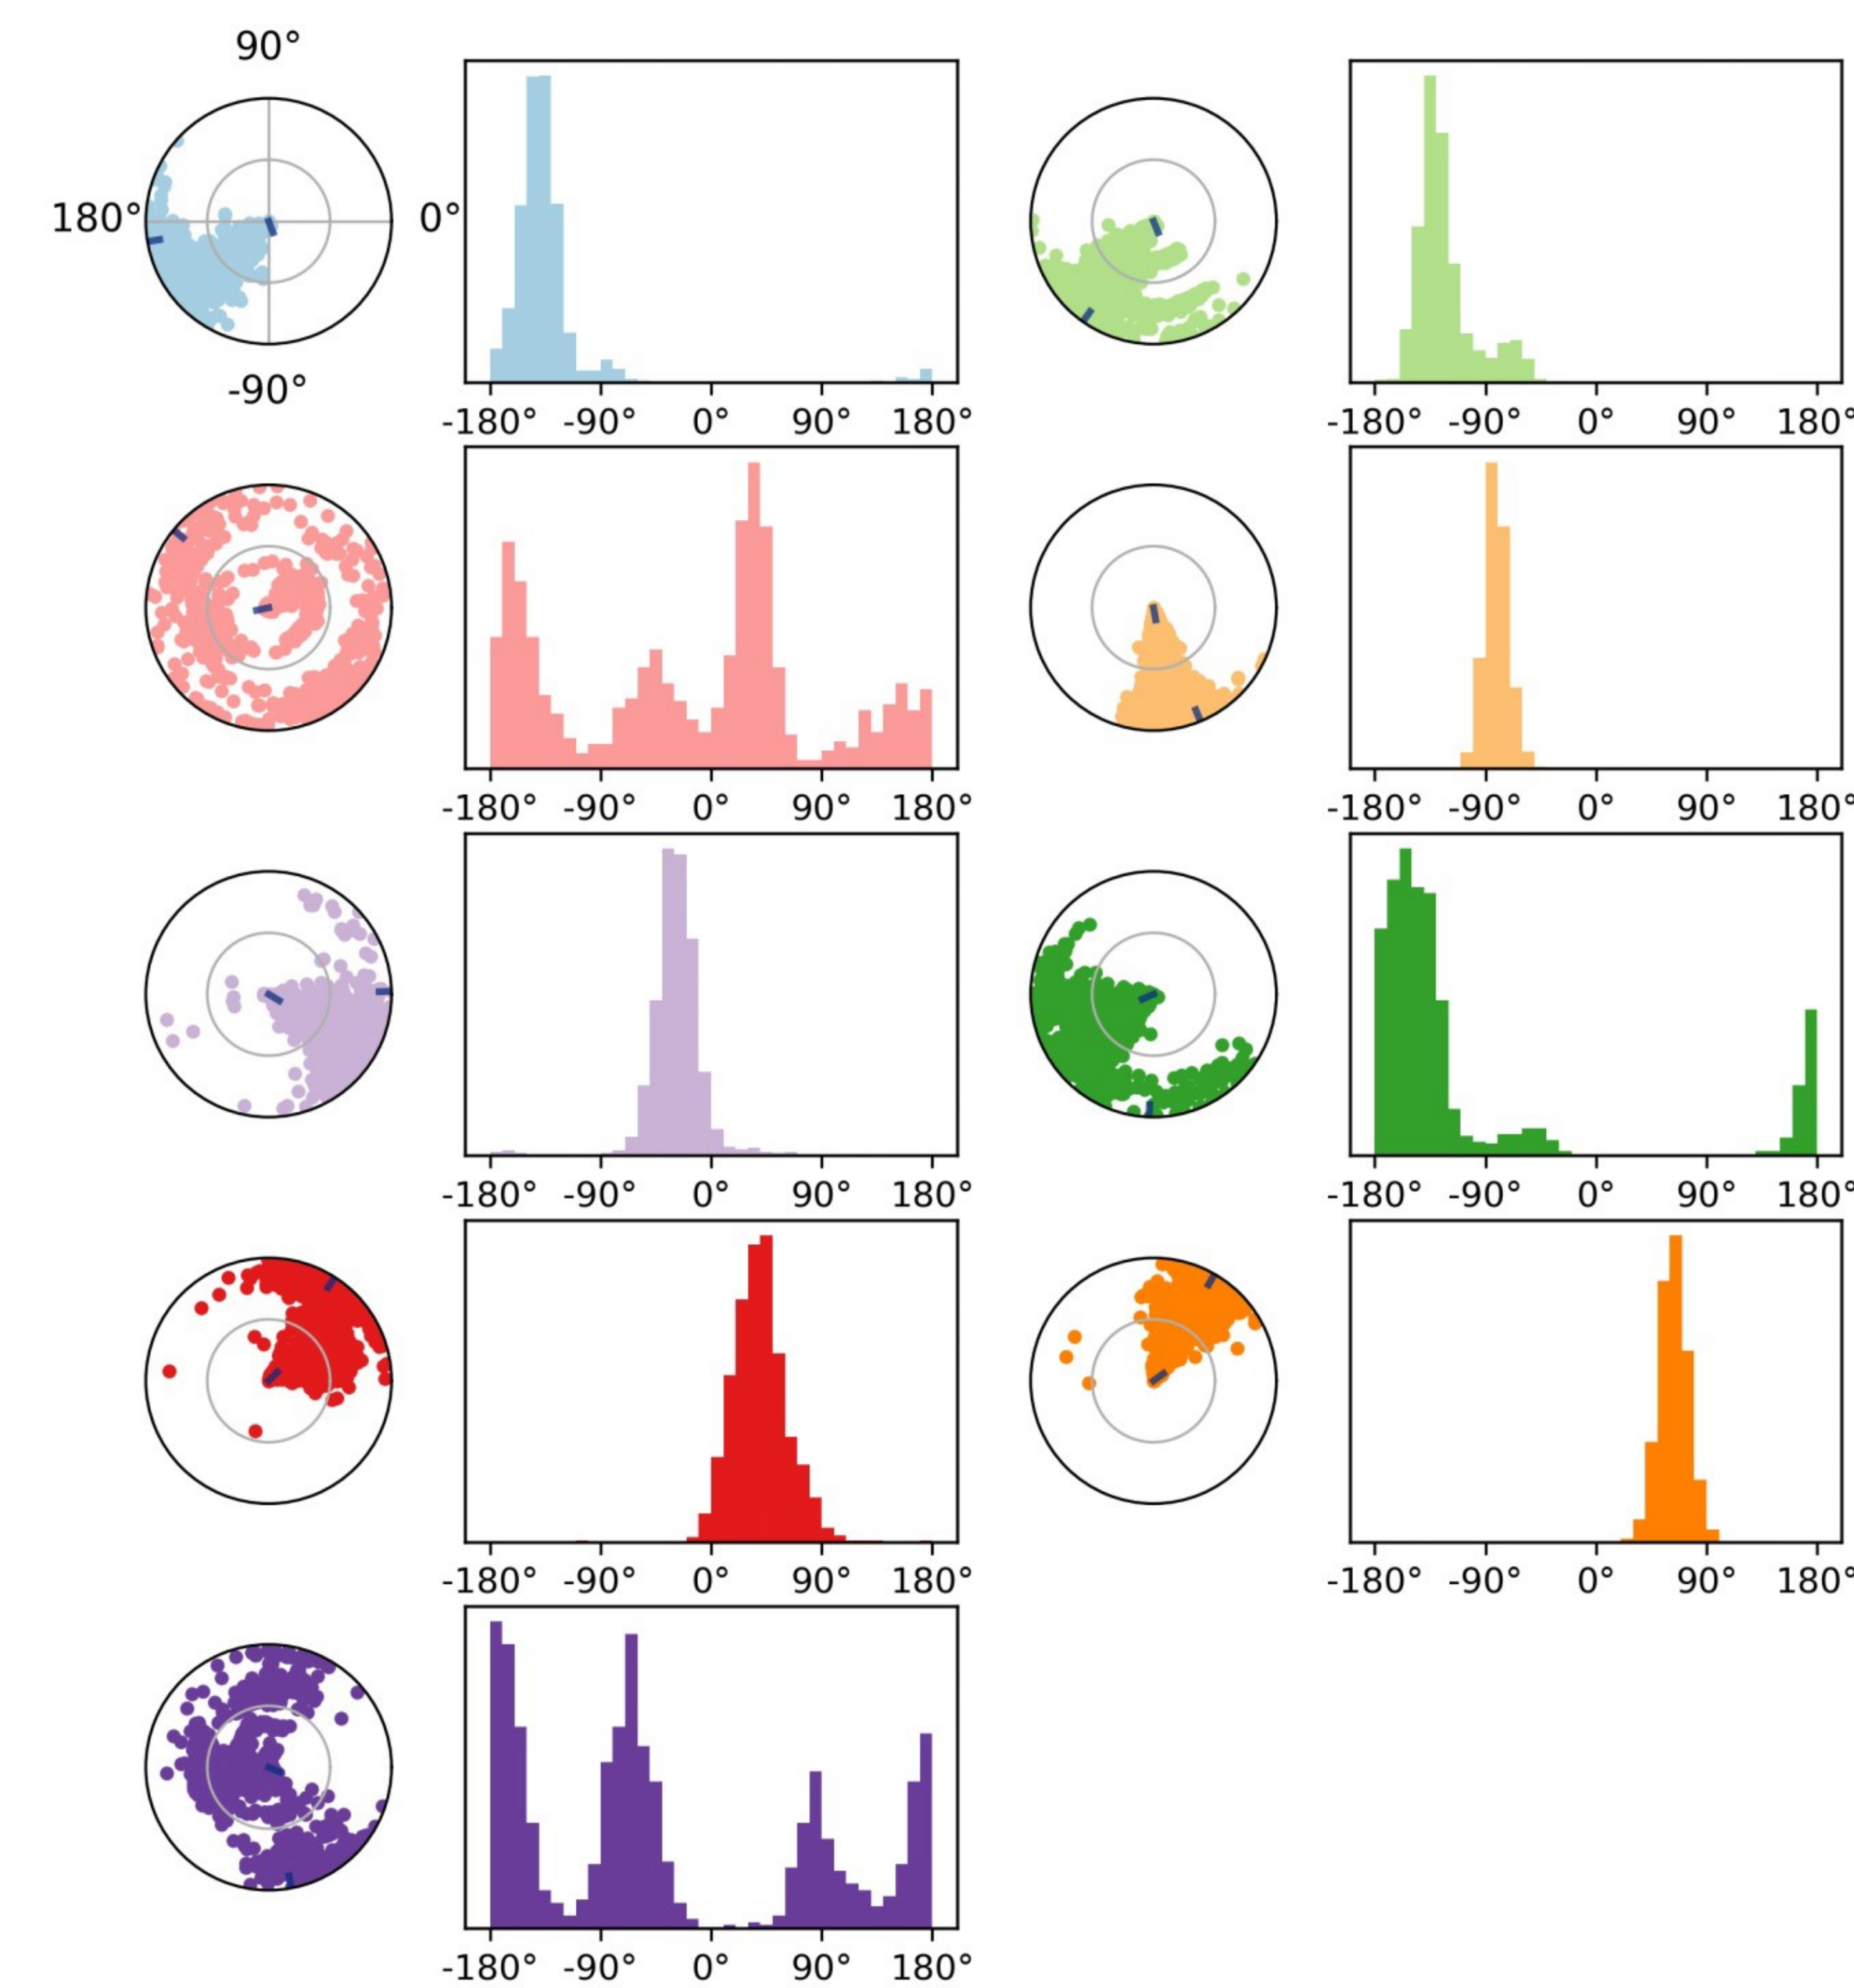

Supplement: d2ra07193b1.pdf [file d2ra07193b1.pdf]
